# Supplementary material for: Dynamic Ultrasound Projector Controlled by Light
Source: PubMed Central journal article supplement (PMC8948597; doi:10.1002/advs.202104401), 2022-01-24
Supplement: ADVS-9-2104401-s001.pdf [file ADVS-9-2104401-s001.pdf]

## Supporting Information

for *Adv. Sci.*, DOI: 10.1002/adv.202104401

Dynamic ultrasound projector controlled by light

*Zhichao Ma\**, *Hyungmok Joh*, *Donglei Fan*, *Peer Fischer\**

## Supporting Information

## Dynamic ultrasound projector controlled by light

*Zhichao Ma<sup>\*</sup>, Hyungmok Joh, Donglei Fan, Peer Fischer<sup>\*</sup>*

## Supplementary Figure

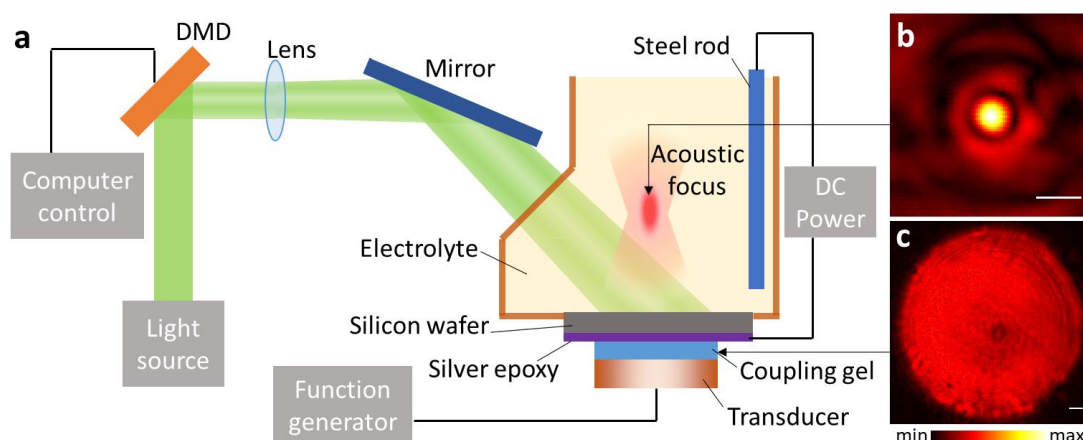

Figure S1. (a) The schematic of the experimental setup. The acoustic pressure scan shows an acoustic focus at the target plane (b), which is modulated from the plane acoustic waves emitted by the transducer (c). The hydrophone scan of (c) is conducted in a water tank, in which the transducer is immersed. The scale bars are both 2 mm in (b) and (c).

## Supplementary Table

Table S1. The acoustic properties of the components used in the dynamic ultrasound projection system.

| Component             | Material                                | Density (kg m <sup>-3</sup> ) | Speed of Sound (m s <sup>-1</sup> ) | Acoustic Impedance (MRayl) |
|-----------------------|-----------------------------------------|-------------------------------|-------------------------------------|----------------------------|
| Coupling gel          | Glycerol                                | 1260                          | 1964                                | 2.5                        |
| Photoconductive layer | Silicon                                 | 2330                          | 8433                                | 19.6                       |
| Electrolyte           | K <sub>2</sub> SO <sub>4</sub> solution | 1060                          | 1500                                | 1.6                        |
| Microbubble           | Hydrogen                                | 0.089                         | 1300                                | 1.16×10 <sup>-4</sup>      |

**Experimental videos**

**Video S1.** Microbubble generation via light controlled electrochemical reactions. From 0 s to 10 s of the video, the DC power was turned on but without laser light projection. The bright white spots are the reflections of the background illumination by the unpolished silicon wafer. At 10 s, the laser light was projected onto the silicon wafer surface for 0.1 s. The bubbles were then generated by the light controlled electrochemical reaction.

**Video S2.** Light pattern addressed bubble generation. At 1.0 s of the video, the light patterns modulated by the optical system were projected on the wafer for 0.1 s. Then the corresponding bubble pattern was generated.
